# Supplementary material for: Synthesizing evidence and identifying knowledge gaps in the role of swine in Japanese encephalitis virus transmission: a rapid systematic review of the literature
Source: Frontiers journal article supplement (doi:10.3389/fsufs.2024.1455455), 2024-11-28
Supplement: Data_Sheet_3.DOCX [file Data_Sheet_3.DOCX]

**Supplemental Material 3.** Reference list of the 227 articles included in the data synthesis, in alphabetical order.

1. Angami, K., Chakravarty, S.K., Das, M.S., Chakraborty, M.S., and Mukherjee, K.K. (1989). Seroepidemiological study of Japanese encephalitis in Dimapur, Nagaland. *The* *Journal of communicable diseases*, 21(2), 87–95.
2. Baniya, V., and Keval, R. (2020). The influence of vaccination on the control of JE with a standard incidence rate of mosquitoes, pigs and humans. *Journal of applied mathematics and computing*, 64(1), 519–550. doi: 10.1007/s12190-020-01367-y.
3. Baruah, A., Hazarika, R., Barman, N., Islam, S., and Gulati, B. (2018). Mosquito abundance and pig seropositivity as a correlate of Japanese encephalitis in human population in Assam, India. *Journal of vector borne diseases*, 55(4), 291–296. doi: 10.4103/0972-9062.256564.
4. Borah, J., Dutta, P., Khan, S.A., and Mahanta, J. (2013). Epidemiological concordance of Japanese encephalitis virus infection among mosquito vectors, amplifying hosts and humans in India. *Epidemiology & Infection*, 141(1), 74–80. doi: 10.1017/S0950268812000258.
5. Burke, D.S., Tingpalapong, M., Elwell, M.R., Paul, P.S., and Van Deusen, R.A. (1985a). Japanese encephalitis virus immunoglobulin M antibodies in porcine sera. *American journal of veterinary research,* 46(10), 2054–2057.
6. Burke, D.S., Tingpalapong, M., Ward, G.S., Andre, R., and Leake, C.J. (1985b). Intense transmission of Japanese encephalitis virus to pigs in a region free of epidemic encephalitis. *The Southeast Asian journal of tropical medicine and public health,* 16(2), 199–206.
7. Burke, D.S., Ussery, M.A., Elwell, M.R., Nisalak, A., Leake, C.J., and Laorpongse, T. (1985c). Isolation of Japanese encephalitis virus strains from sentinel pigs in northern Thailand, 1982. *Transactions of the Royal Society of Tropical Medicine and Hygiene,* 79(3), 420–421. doi: 10.1016/0035-9203(85)90399-2.
8. Burns, K.F. (1950). Congenital Japanese B encephalitis infection of swine. *Proceedings of the Society for Experimental Biology and Medicine,* 75(2), 621–625.
9. Cao, Q.S., Li, X.M., Zhu, Q.Y., Wang, D.D., Chen, H.C., and Qian, P. (2011). Isolation and molecular characterization of genotype I Japanese encephalitis virus, SX09S-01, from pigs in China. *Virology journal,* 8, 1-9. doi: 10.1186/1743-422X-8-472.
10. Cappelle, J., Duong, V., Pring, L., Kong, L., Yakovleff, M., Prasetyo, D.B., Peng, B., Choeung, R., Duboz, R., Ong, S., and Sorn, S. (2016). Intensive circulation of Japanese encephalitis virus in peri-urban sentinel pigs near Phnom Penh, Cambodia. *PLoS neglected tropical diseases*, 10(12). doi: 10.1371/journal.pntd.0005149.
11. Cardosa, M.J., Hah, F.L., Choo, B.H., and Padmanathan, S. (1993). Screening of pig sera for antibodies to Japanese encephalitis virus using a dot enzyme immunoassay and IgM capture ELISA: comparison with the hemagglutination inhibition and plaque reduction neutralization tests. *The Southeast Asian journal of tropical medicine and public health,* 24(3), 472–476.
12. Carey, D.E., Reuben, R., and Myers, R.M. (1969). Japanese encephalitis studies in Vellore, South India. V. Experimental infection and transmission. *Indian journal of medical research,* 57(2), 282–289.
13. Cha, G.W., Lee, E.J., Lim, E.J., Sin, K.S., Park, W.W., Jeon, D.Y., Han, M.G., Lee, W.J., Choi, W.Y., and Jeong, Y.E. (2015). A novel immunochromatographic test applied to a serological survey of Japanese encephalitis virus on pig farms in Korea. *Plos one,* 10(5). doi: 10.1371/journal.pone.0127313.
14. Chai, C., Wang, Q., Cao, S., Zhao, Q., Wen, Y., Huang, X., Wen, X., Yan, Q., Ma, X., and Wu, R. (2018). Serological and molecular epidemiology of Japanese encephalitis virus infections in swine herds in China, 2006-2012. *Journal of veterinary science,* 19(1), 151–155. doi: 10.4142/jvs.2018.19.1.151.
15. Chang, C.P., New, A.E., Chiang, H.S., Irving, G.S., Taylor, J.F., and Chen, W.F. (1974). A surveillance for Japanese encephalitis (JE) pigs in southern Taiwan. *Chinese journal of microbiology,* 7(1), 6–12.
16. Chang, H.C., Takashima, I., Arikawa, J., and Hashimoto, N. (1984a). Biotin-labeled antigen sandwich enzyme-linked immunosorbent assay (BLA-S-ELISA) for the detection of Japanese encephalitis antibody in human and a variety of animal sera. *Journal of immunological methods,* 72(2), 401–409. doi: 10.1016/0022-1759(84)90008-5.
17. Chang, H.C., Takashima, I., Arikawa, J., and Hashimoto, N. (1984b). Biotin-labeled protein-A enzyme-linked immunosorbent assay for the detection of Japanese encephalitis antibody in sera from humans, swine and several animal species. *Journal of virological methods,* 9(2), 143–151. doi: 10.1016/0166-0934(84)90006-5.
18. Chang, K.J. (2002). Seasonal prevalence of anti-Japanese encephalitis virus antibody in pigs in different regions of Taiwan. *Journal of microbiology, immunology, and infection= Wei mian yu gan ran za zhi*, 35(1), 12–16.
19. Chattopadhyay, U.K. (2001). A study on the status of Japanese encephalitis infection in Arunachal Pradesh. *The Journal of communicable diseases*, 33(4), 261–265.
20. Chauhan, J., Dhanze, H., Kumar H.B., Kumar, M.S., and Bhilegaonkar, K.N. (2020). Development of dipstick enzyme linked immunosorbent assay for on-site sero-diagnosis of Japanese encephalitis in swine. *Journal of Virological Methods*, 280, 113876. doi: 10.1016/j.jviromet.2020.113876.
21. Chen, H.Y., Wei, Z.Y., Zhang, H.Y., Lü, X.L., Zheng, L.L., Cui, B.A., Jinpeng, L.I.U., Zhu, Q.L., and Wang, Z.X. (2010). Use of a multiplex RT-PCR assay for simultaneous detection of the North American genotype porcine reproductive and respiratory syndrome virus, swine influenza virus and Japanese encephalitis virus. *Agricultural Sciences in China*, 9(7), 1050–1057. doi: 10.1016/S1671-2927(09)60189-9.
22. Chiou, S.S., Chen, J.M., Chen, Y.Y., Chia, M.Y., and Fan, Y.C. (2021). The feasibility of field collected pig oronasal secretions as specimens for the virologic surveillance of Japanese encephalitis virus*. PLoS neglected tropical diseases,* 15(2), e0009977. doi: 10.1371/journal.pntd.0009977.
23. Conlan, J.V., Vongxay, K., Jarman, R.G., Gibbons, R.V., Lunt, R.A., Fenwick, S., Thompson, R.A., and Blacksell, S.D. (2012). Serologic study of pig-associated viral zoonoses in Laos. *The American journal of tropical medicine and hygiene*, 86(6), 1077–1084. doi: 10.4269/ajtmh.2012.11-0195.
24. Datey, A., Singh, L.M., Rajkhowa, U., Prusty, B.K., Saswat, T., Mamidi, P., Barkalita, L.M., Dutta, R., Sharma, K.C., Sahoo, D., and Borah, P. (2020). Molecular epidemiology of Japanese encephalitis virus in pig population of Odisha, Assam and Manipur states of India. *Infection, Genetics and Evolution*, 83, 104325. doi: 10.1016/j.meegid.2020.104325.
25. De, A., Maity, K., Jana, S., and Maiti, M. (2016). Application of various control strategies to Japanese encephalitic: a mathematical study with human, pig and mosquito. *Mathematical biosciences,* 282, 46–60. doi: 10.1016/j.mbs.2016.09.015.
26. de Wispelaere, M., Ricklin, M., Souque, P., Frenkiel, M.-P., Paulous, S., Garcìa-Nicolàs, O., Summerfield, A., Charneau, P., and Desprès, P. (2015). A lentiviral vector expressing Japanese encephalitis virus-like particles elicits broad neutralizing antibody response in pigs. *PLoS neglected tropical diseases,* 9(10), e0004081. doi: 10.1371/journal.pntd.0004081.
27. Desingu, P.A., Ray, P.K., Patel, B.H.M., Singh, R., Singh, R.K., and Saikumar, G. (2016). Pathogenic and genotypic characterization of a Japanese encephalitis virus isolate associated with reproductive failure in an Indian pig herd. *PLoS one*, 11(2), e0147611. doi: 10.1371/journal.pone.0147611.
28. Detels, R., Cates, M.D., Cross, J.H., Irving, G.S., and Watten, R.H. (1970). Ecology of Japanese encephalitis virus on Taiwan in 1968. *The American journal of tropical medicine and hygiene*, 19(4), 716–723. doi: 10.4269/ajtmh.1970.19.716.
29. Detels, R., Cross, J.H., Huang, W.C., Lien, J.C., and Chen, S. (1976). Japanese encephalitis virus in Northern Taiwan, 1969-1973. *The American journal of tropical medicine and hygiene*, 25(3), 477–485. doi: 10.4269/ajtmh.1976.25.477.
30. Detha, A., Wuri, D.A., and Santhia, K. (2015). Seroprevalence of Japanese encephalitis virus using competitive enzyme linked immunosorbent assay (C-ELISA) in pigs in East Sumba, Indonesia. *Journal of advanced veterinary and animal research,* 2(4), 481–483. doi: 10.5455/javar.2015.b112.
31. Dhanze, H., Bhilegaonkar, K.N., Ravi Kumar, G.V.P.P.S., Thomas, P., Chethan Kumar, H.B., Suman Kumar, M., Rawat, S., Kerketta, P., Rawool, D.B., and Kumar, A. (2015). Comparative evaluation of nucleic acid-based assays for detection of Japanese encephalitis virus in swine blood samples. *Archives of virology,* 160, 1259–1266. doi: 10.1007/s00705-015-2385-3.
32. Dhanze, H., Bhilegaonkar, K.N., Rawat, S., Chethan Kumar, H.B., Kumar, A., Gulati, B.R., Mishra, B.P., and Singh, R.K. (2019). Development of recombinant nonstructural 1 protein based indirect enzyme linked immunosorbent assay for sero-surveillance of Japanese encephalitis in swine. *Journal of virological methods,* 272, 113705. doi: 10.1016/j.jviromet.2019.113705.
33. Dhanze, H., Bhilegaonkar, K.N., Kumar, C., Kumar, M.S., Singh, P., and Kumar, A. (2020a). Development and evaluation of lateral flow assay for sero-diagnosis of Japanese encephalitis in swine. *Animal Biotechnology,* 31(4), 350–356. doi: 10.1080/10495398.2019.1602539.
34. Dhanze, H., Kumar, M.S., Singh, V., Gupta, M., Bhilegaonkar, K.N., Kumar, A., Mishra, B.P., and Singh, R.K. (2020b). Detection of recent infection of Japanese encephalitis virus in swine population using IgM ELISA: a suitable sentinel to predict infection in humans. *Journal of immunological methods,* 486, 112848. doi: 10.1016/j.jim.2020.112848.
35. Di Francesco, J., Choeung, R., Peng, B., Pring, L., Pang, S., Duboz, R., Ong, S., Sorn, S., Tarantola, A., Fontenille, D., and Duong, V. (2018). Comparison of the dynamics of Japanese encephalitis virus circulation in sentinel pigs between a rural and a peri-urban setting in Cambodia. *PLoS neglected tropical diseases,* 12(8), e0006644. doi: 10.1371/journal.pntd.0006644.
36. Diallo II, A.O., Chevalier, V., Cappelle, J., Duong, V., Fontenille, D., and Duboz, R. (2018). How much does direct transmission between pigs contribute to Japanese Encephalitis virus circulation? A modelling approach in Cambodia. *PloS one,* 13(8), e0201209. doi: 10.1371/journal.pone.0201209.
37. Doi, R., Chinzei, H., Oya, A., and Kobayashi, M. (1967). Hemagglutination inhibition antibody titers against Japanese encephalitis virus from human and pig sera of Amami-Oshima Island. *Japanese Journal of Experimental Medicine*, 37(3), 239-243.
38. Duong, V., Sorn, S., Holl, D., Rani, M., Deubel, V., and Buchy, P. (2011). Evidence of Japanese encephalitis virus infections in swine populations in 8 provinces of Cambodia: implications for national Japanese encephalitis vaccination policy. *Acta tropica,* 120(1-2), 146–150. doi: 10.1016/j.actatropica.2011.07.008.
39. Duong, V., Choeung, R., Gorman, C., Laurent, D., Crabol, Y., Mey, C., Peng, B., Di Francesco, J., Hul, V., Sothy, H., and Santy, K. (2017). Isolation and full-genome sequences of Japanese encephalitis virus genotype I strains from Cambodian human patients, mosquitoes and pigs. *Journal of General Virology,* 98(9), 2287–2296. doi: 10.1099/jgv.0.000892.
40. Dutta, P., Khan, S.A., Khan, A.M., and Mahanta, J. (2007). Japanese encephalitis B-virus among the porcine population of Assam. *Indian veterinary journal,* 84(11), 1125–1127.
41. Dutta, P., Khan, S.A., Khan, A.M., Borah, J., Sarmah, C.K., and Mahanta, J. (2011). The effect of insecticide-treated mosquito nets (ITMNs) on Japanese encephalitis virus seroconversion in pigs and humans. *The American journal of tropical medicine and hygiene,* 84(3), 466–472. doi: 10.4269/ajtmh.2011.10-0270.
42. Fan, J.-M., Luo, J., Chen, L., Teng, M., Bu, D., Wang, F.-Y., Wang, L., Wang, C.Q., and Zhang, G.P. (2010a). Genetic analysis of strains of Japanese encephalitis virus isolated from swine in central China. *Virus genes,* 40, 357–361. doi: 10.1007/s11262-010-0464-9.
43. Fan, J.-M., Luo, J., Zhang, G.-P., Chen, L., Teng, M., Yang, M.-F., Wang, L., and Wang, C.Q. (2010b). Identification and characterization of Japanese encephalitis virus envelope protein gene from swine. *Letters in applied microbiology,* 51(1), 11-17. doi: 10.1111/j.1472-765X.2010.02850.x.
44. Fan, Y.-C., Chen, J.-M., Chen, Y.-Y., Lin, J.-W., and Chiou, S.-S. (2013). Reduced neutralizing antibody titer against genotype I virus in swine immunized with a live-attenuated genotype III Japanese encephalitis virus vaccine. *Veterinary microbiology,* 163(3-4), 248–256. doi: 10.1016/j.vetmic.2013.01.017.
45. Fan, Y.-C., Chen, J.-M., Lin, J.-W., Chen, Y.-Y., Wu, G.-H., Su, K.-H., Chiou, M.T., Wu, S.R., Yin, J.H., Liao, J.W., and Chang, G.J.J. (2018). Genotype I of Japanese encephalitis virus virus-like particles elicit sterilizing immunity against genotype I and III viral challenge in swine. *Scientific reports,* 8(1), 7481. doi: 10.1038/s41598-018-25596-1.
46. Fan, Y.-C., Liang, J.-J., Chen, J.-M., Lin, J.-W., Chen, Y.-Y., Su, K.-H., Lin, C.C., Tu, W.C., Chiou, M.T., Ou, S.C., and Chang, G.J.J. (2019). NS2B/NS3 mutations enhance the infectivity of genotype I Japanese encephalitis virus in amplifying hosts. *PLoS pathogens,* 15(8), e1007992. doi: 10.1371/journal.ppat.1007992.
47. Fan, Y.-C., Chen, Y.-Y., Chen, J.-M., Huang, C., Huang, M., and Chiou, S.-S. (2022). Effectiveness of live-attenuated genotype III Japanese encephalitis viral vaccine against circulating genotype I viruses in swine. *Viruses,* 14(1), 114. doi: 10.3390/v14010114.
48. Fei-fei, G., Jian, W., Feng, X., Li-ping, S., Quan-yun, S., Jin-ping, Z., Pu-yan, C. and Pei-hong, L. (2008). Japanese encephalitis protein vaccine candidates expressing neutralizing epitope and M.T hsp70 induce virus-specific memory B cells and long-lasting antibodies in swine. *Vaccine,* 26(44), 5590–5594. doi: 10.1016/j.vaccine.2008.07.104.
49. Fujisaki, Y., Sugimori, T., Morimoto, T., Miura, Y., and Kawakami, Y. (1975). Immunization of pigs with the attenuated S-strain of Japanese encephalitis virus. *National Institute of Animal Health Quarterly,* 15(2), 55–60.
50. García-Nicolás, O., Ricklin, M., Liniger, M., Vielle, N., Python, S., Souque, P., Charneau, P., and Summerfield, A. (2017). A Japanese encephalitis virus vaccine inducing antibodies strongly enhancing in vitro infection is protective in pigs. *Viruses*, 9(5), 124. doi: 10.3390/v9050124.
51. Geevarghese, G., Shaikh, B.H., Jacob, P.G., Bhat, H.R., and Pavri, K.M. (1987). Domestic pigs as sentinels to monitor the activity of Japanese encephalitis & West Nile viruses in Kolar district, Karnataka. *Indian journal of medical research,* 86, 413–418.
52. Geevarghese, G., Shaikh, B.H., Jacog, P.G., and Bhat, H.R. (1991). Monitoring Japanese encephalitis virus activity using domestic sentinel pigs in Mandya district, Karnataka state (India). *Indian journal of medical research,* 93, 140–142.
53. Geevarghese, G., Shaikh, B.H., Jacob, P.G., and Bhat, H.R. (1994). Persistence of haemagglutination-inhibition antibodies to JE and WN viruses in naturally infected domestic pigs in Karnataka State, India. *Acta Virologica,* 38(4), 235–237.
54. Gingrich, J.B., Nisalak, A., Latendresse, J.R., Pomsdhit, J., Paisansilp, S., Hoke, C.H., Chantalakana, C., Satayaphantha, C., and Uechiewcharnkit, K. (1987). A longitudinal study of Japanese encephalitis in suburban Bangkok, Thailand. *The Southeast Asian journal of tropical medicine and public health,* 18(4), 558–566.
55. Gingrich, J.B., Nisalak, A., Latendresse, J.R., Sattabongkot, J., Hoke, C.H., Pomsdhit, J., Chantalakana, C., Satayaphanta, C., Uechiewcharnkit, K., and Innis, B.L. (1992). Japanese encephalitis virus in Bangkok: factors influencing vector infections in three suburban communities. *Journal of medical entomology*, 29(3), 436–444. doi: 10.1093/jmedent/29.3.436.
56. Goswami, N.K. (2022). Sensitivity and optimal control analysis of Japanese encephalitis disease: a mathematical model. *Advances in Systems Science and Applications,* 22(1), 148–166. doi: 10.25728/assa.2022.22.1.1180.
57. Grace, M.R., Dhanze, H., Pantwane, P., Sivakumar, M., Gulati, B., and Kumar, A. (2019a). Latex agglutination test for rapid on-site serodiagnosis of Japanese encephalitis in pigs using recombinant NS1 antigen. *Journal of vector borne diseases,* 56(2), 105–110. doi: 10.4103/0972-9062.263717.
58. Grace, M.R., Chauhan, J., Suman Kumar, M., Kumar, A., Bhilegaonkar, K.N., Singh, M., and Dhanze, H. (2019b). Evaluation of carboxyl beads based latex agglutination test for rapid sero-diagnosis of Japanese encephalitis. *Biologicals,* 62, 72–76. doi: 10.1016/j.biologicals.2019.09.003.
59. Gresser, I., Hardy, J.L., Hu, S.M., and Scherer, W.F. (1958). Factors influencing transmission of Japanese B encephalitis virus by a colonized strain of *Culex tritaeniorhynchus* Giles, from infected pigs and chicks to susceptible pigs and birds. *American Journal of Tropical Medicine and Hygiene,* 1(4), 365–373. doi: 10.4269/ajtmh.1958.7.365.
60. Guo, H.-C., Ren, Z.-W., Ding, M.-M., Xiao, W.-J., Peng, P., He, B., Feng, Y., Liu, Y., Li, X.-Y., Cai, J.-Q., Zhang, B.-K., Luo, Q.-H., and Tu, C.-C. (2019). Serologic and molecular survey for major viral pathogens in grazing hybrid wild boars in Northeast China. *Journal of integrative agriculture,* 18(9), 2133–2140. doi: 10.1016/S2095-3119(19)62650-X.
61. Hale, J.H., Lim, K.A., and Colless, D.H. (1957). Investigation of domestic pigs as a potential reservoir of Japanese b encephalitis virus on Singapore Island. *Annals of Tropical Medicine & Parasitology,* 51(4), 374–379. doi: 10.1080/00034983.1957.11685827.
62. Hamano, M., Lim, C.K., Takagi, H., Sawabe, K., Kuwayama, M., Kishi, N., Kurane, I., and Takasaki, T. (2007). Detection of antibodies to Japanese encephalitis virus in the wild boars in Hiroshima prefecture, Japan. *Epidemiology & Infection,* 135(6), 974–977. doi: 10.1017/S0950268806007710.
63. Hanna, J.N., Ritchie, S.A., Phillips, D.A., Shield, J., Bailey, M.C., Mackenzie, J.S., Poidinger, M., McCall, B.J., and Mills, P.J. (1996). An outbreak of Japanese encephalitis in the Torres Strait, Australia, 1995. *Medical journal of Australia*, 165(5), 256–260. doi: 10.5694/j.1326-5377.1996.tb124960.x.
64. Hanna, J.N., Ritchie, S.A., Phillips, D.A., Lee, J.M., Hills, S.L., Van Den Hurk, A.F., Phillips, D.A., Pyke, A.T., Lee, J.M., Johansen, C.A., and Mackenzie, J.S. (1999). Japanese encephalitis in north Queensland, Australia, 1998.  *Medical journal of Australia,* 170(11), 533–536. doi: 10.5694/j.1326-5377.1999.tb127878.x.
65. Hayashi, K., Mifune, K., and Shichijo, A. (1976). Ecology of Japanese encephalitis virus in Nagasaki area, Okinawa and Amami islands. *Tropical medicine,* 17(4), 159–176.
66. Henriksson, E., Söderberg, R., Ström Hallenberg, G., Kroesna, K., Ly, S., Sear, B., Unger, F., Tum, S., Nguyen-Viet, H., and Lindahl, J.F. (2021). Japanese encephalitis in small-scale pig farming in Rural Cambodia: pig seroprevalence and farmer awareness. *Pathogens,* 10(5), 578. doi: 10.3390/pathogens10050578.
67. Higgins, D.A. (1970). A serological survey of pigs in Hong Kong for antibodies to Japanese encephalitis virus. *Tropical animal health and production,* 2, 23–27. doi: 10.1007/BF02359325.
68. Holt, H.R., Inthavong, P., Khamlome, B., Blaszak, K., Keokamphe, C., Somoulay, V., Phongmany, A., Durr, P.A., Graham, K., Allen, J., and Donnelly, B. (2016). Endemicity of zoonotic diseases in pigs and humans in lowland and upland Lao PDR: identification of socio-cultural risk factors. *PLoS neglected tropical diseases,*10(4), e0003913. doi: 10.1371/journal.pntd.0003913.
69. Hu, L., Lin, X., Nie, F., Yao, X., Li, G., Wu, X., Ren, M., and Wang, Y. (2016). Simultaneous typing of seven porcine pathogens by multiplex PCR with a GeXP analyser. *Journal of virological methods,* 232, 21–28. doi: 10.1016/j.jviromet.2015.12.004.
70. Hurlbut, H.S. (1964). The pig-mosquito cycle of Japanese encephalitis virus in Taiwan. *Journal of medical entomology,* 1(3), 301–307. doi: 10.1093/jmedent/1.3.301.
71. Igarashi, A., Morita, K., Bundo, K., Matsuo, S., Hayashi, K., Matsuo, R., Harada, T., Tamoto, H., and Kuwatsuka, M. (1981). Isolation of Japanese encephalitis and Getah viruses from *Culex tritaeniorhynchus* and slaughtered swine blood using *Aedes albopictus* clone C6/36 cells in Nagasaki, 1981. *Tropical medicine,* 23(4), 177–187.
72. Igarashi, A., Ogata, T., Fujita, N., Fukunaga, T., Mori, A., Uzuka, Y., Supawadee, J., Chiowanich, P., Peerakome, S., and Leechanachai, P. (1983). Flavivirus infections in Chiang Mai area, Thailand, in 1982. *The Southeast Asian journal of tropical medicine and public health,* 14(4), 470–480.
73. Ilkal, M.A., Prasanna, Y., Jacob, P.G., Geevarghese, G., and Banerjee, K. (1994). Experimental studies on the susceptibility of domestic pigs to West Nile virus followed by Japanese encephalitis virus infection and vice versa. *Acta Virologica,* 38(3), 157–161.
74. Imoto, J.-I., Ishikawa, T., Yamanaka, A., Konishi, M., Murakami, K., Shibahara, T., Kubo, M., Lim, C.K., Hamano, M., Takasaki, T., and Kurane, I. (2010). Needle-free jet injection of small doses of Japanese encephalitis DNA and inactivated vaccine mixture induces neutralizing antibodies in miniature pigs and protects against fetal death and mummification in pregnant sows. *Vaccine,* 28(46), 7373–7380. doi: 10.1016/j.vaccine.2010.09.008
75. Johnsen, D.O., Edelman, R., Grossman, R.A., Muangman, D., Pomsdhit, J., and Gould, D.J. (1974). Study of Japanese encephalitis virus in Chiangmai Valley, Thailand V. Animal infections. *American journal of epidemiology,*100(1), 57–68. doi: 10.1093/oxfordjournals.aje.a112009.
76. Kakkar, M., Chaturvedi, S., Saxena, V.K., Dhole, T.N., Kumar, A., Rogawski, E.T., Abbas, S., Venkataramanan, V.V., and Chatterjee, P. (2017). Identifying sources, pathways and risk drivers in ecosystems of Japanese Encephalitis in an epidemic-prone north Indian district. *PLoS one,* 12(5), e0175745. doi: 10.1371/journal.pone.0175745.
77. Kalimuddin, M.D., Narayan, K.G., and Choudhary, S.P. (1982a). Serological evidence of Japanese encephalitis virus activity in Bihar. *International journal of zoonoses,* 9(1), 39–44.
78. Kalimuddin, M.D., Narayan, K.G., and Choudhary, S.P. (1982b). Possible relation of seropositivity to Japanese encephalitis in pigs with the 1978 epidemic of human encephalitis in Bihar. *Transactions of the Royal Society of Tropical Medicine and Hygiene,* 76(5), 639–640. doi: 10.1016/0035-9203(82)90230-9.
79. Khan, S.U., Salje, H., Hannan, A., Islam, M.A., Bhuyan, A.A.M., Rahman, M.Z., Nahar, N., Hossain, M.J., Luby, S.P., and Gurley, E.S. (2014). Dynamics of Japanese encephalitis virus transmission among pigs in Northwest Bangladesh and the potential impact of pig vaccination. *PLoS neglected tropical diseases*, 8(9), e3166. doi: 10.1371/journal.pntd.0003166.
80. Kharismawati, H., Fatmawati, and Windarto. (2019). Optimal control of a mathematical model for Japanese encephalitis transmission. *Journal of physics: conference series,* 1306(1), 012034. IOP Publishing. doi: 10.1088/1742-6596/1306/1/012034
81. Kodama, K., Sasaki, N., and Inoue, Y.K. (1968). Studies of live attenuated Japanese encephalitis vaccine in swine. *The journal of immunology,* 100(1), 194–200. doi: 10.4049/jimmunol.100.1.194.
82. Kolhe, R.P., Bhilegaonkar, K.N., Dubbal, Z.B., Kaur, S., Das, S., and Agarwal, R.K. (2015). Indirect ELISA for serosurveillance of Japanese encephalitis in pigs. *Indian journal of animal research,* 49(3), 343-349. doi: 10.5958/0976-0555.2015.00065.5.
83. Komiya, T., Toriniwa, H., Matsumura, T., Takegami, T., and Nakayama, T. (2019). Epidemiological study on Japanese encephalitis virus distribution in Ishikawa prefecture, Japan, by serological investigation using wild boar sera. *Journal of veterinary medical science,* 81(6), 903–905. doi: 10.1292/jvms.18-0613.
84. Konishi, E., and Yamaoka, M. (1982). Enzyme-linked immunosorbent assay for detection of antibodies to Japanese encephalitis virus in swine sera. *The Kobe journal of the medical sciences,* 28(1), 7–17.
85. Konishi, E., and Yamaoka, M. (1983). Rapid enzyme-linked immunosorbent assay of whole blood for detection of antibodies to Japanese encephalitis virus. *Journal of virological methods*, 7(1), 21–28. doi: 10.1016/0166-0934(83)90019-8.
86. Konishi, E., Pincus, S., Paoletti, E., Laegreid, W.W., Shope, R.E., and Mason, P.W. (1992). A highly attenuated host range-restricted vaccinia virus strain, NYVAC, encoding the prM, E, and NS1 genes of Japanese encephalitis virus prevents JEV viremia in swine. *Virology,* 190(1), 454–458. doi: 10.1016/0042-6822(92)91233-K.
87. Konishi, E., Yamaoka, M., Kurane, I., and Mason, P.W. (2000). Japanese encephalitis DNA vaccine candidates expressing premembrane and envelope genes induce virus-specific memory B cells and long-lasting antibodies in swine. *Virology,* 268(1), 49–55. doi: 10.1006/viro.1999.0142.
88. Konno, J., Endo, K., Agatsuma, H., and Ishida, N. (1966). Cyclic outbreaks of Japanese encephalitis among pigs and humans. *American Journal of epidemiology*, 84(2), 292–300. doi: 10.1093/oxfordjournals.aje.a120643.
89. Konno, J., Endo, K., and Ishida, N. (1967). The nature of antibody in swine naturally infected with Japanese encephalitis virus. *Proceedings of the Society for Experimental Biology and Medicine,* 124(1), 73–75. doi: 10.3181/00379727-124-31669.
90. Kumar, K., Arshad, S.S., Selvarajah, G.T., Abu, J., Toung, O.P., Abba, Y., Bande, F., Yasmin, A.R., Sharma, R., Ong, B.L., and Rasid, A.A. (2018). Prevalence and risk factors of Japanese encephalitis virus (JEV) in livestock and companion animal in high-risk areas in Malaysia. *Tropical animal health and production*, 50, 741–752. doi: 10.1007/s11250-017-1490-6.
91. Kumar, H.B.C., Dhanze, H., Bhilegaonkar, K.N., Chakurkar, E.B., Kumar, A., and Yathish, H.M. (2020a). Reply to commentary on Serological evidence of Japanese encephalitis virus infection in pigs in a low human incidence state, Goa, India. *Preventive veterinary medicine,* 177, 104945. doi: 10.1016/j.prevetmed.2020.104945.
92. Kumar, H.B.C., Dhanze, H., Bhilegaonkar, K.N., Chakurkar, E.B., Kumar, A., and Yathish, H.M. (2020b). Serological evidence of Japanese encephalitis virus infection in pigs in a low human incidence state, Goa, India. *Preventive veterinary medicine,* 175, 104882 doi: 10.1016/j.prevetmed.2020.104882.
93. Kuwata, R., Torii, S., Shimoda, H., Supriyono, S., Phichitraslip, T., Prasertsincharoen, N., Takemae, H., Bautista, R.C.J.T., Ebora, V.D.B.M., Abella, J.A.C., and Dargantes, A.P. (2020). Distribution of Japanese encephalitis virus, Japan and Southeast Asia, 2016–2018. *Emerging infectious diseases,* [e-journal] 26(1), 125. Available at: https://www.ncbi.nlm.nih.gov/pmc/articles/PMC6924880/ [Accessed 12 February 2023]
94. Kurane, I., Shibasaki, K., Kotaki, A., Hijioka, Y., and Takasaki, T. (2013). The effect of precipitation on the transmission of Japanese encephalitis (JE) virus in nature: a complex effect on antibody-positive rate to JE virus in sentinel pigs. *International Journal of Environmental Research and Public Health,* 10(5), 1831–1844. doi: 10.3390/ijerph10051831.
95. Ladreyt, H., Durand, B., Dussart, P., and Chevalier, V. (2019). How central is the domestic pig in the epidemiological cycle of Japanese encephalitis virus? A review of scientific evidence and implications for disease control. *Viruses,* 11(10), 949.
96. Ladreyt, H., Auerswald, H., Tum, S., Ken, S., Heng, L., In, S., Lay, S., Top, C., Ly, S., Duong, V., and Dussart, P. (2020). Comparison of Japanese encephalitis force of infection in pigs, poultry and dogs in Cambodian villages. *Pathogens,* 9(9), 719. doi: 10.3390/pathogens9090719.
97. Ladreyt, H., Chevalier, V., and Durand, B. (2022). Modelling Japanese encephalitis virus transmission dynamics and human exposure in a Cambodian rural multi-host system. *PLoS neglected tropical diseases,* 16(7), p.e0010572.
98. Lee, G.C.Y., Huang, Y.T., and Chang, L.C. (1975). Preliminary study of attenuated Japanese encephalitis virus. *Journal of the Formosan Medical Association*, 74(9), 606–612.
99. Lee, H.S., Thanh, T.L., Ly, N.K., Nguyen-Viet, H., Thakur, K.K., and Grace, D. (2019). Seroprevalence of leptospirosis and Japanese encephalitis in swine in ten provinces of Vietnam. *PLoS one,* 14(8), e0214701. doi: 10.1371/journal.pone.0214701.
100. Lee, H.S., Bui, V.N., Nguyen, H.X., Bui, A.N., Hoang, T.D., Nguyen-Viet, H., Grace Randolph, D., and Wieland, B. (2020). Seroprevalences of multi-pathogen and description of farm movement in pigs in two provinces in Vietnam. *BMC veterinary research*, 16, 15. doi: 10.1186/s12917-020-2236-7.
101. Li, P., Zheng, Q.S., Wang, Q., Li, Y., Wang, E.X., Liu, J.J., Cao, R.B., and Chen, P.Y. (2008). Immune responses of recombinant adenoviruses expressing immunodominant epitopes against Japanese encephalitis virus. *Vaccine,* 26(46), 5802–5807. doi: 10.1016/j.vaccine.2008.08.035.
102. Li, Y., Hou, L., Ye, J., Liu, X., Dan, H., Jin, M., Chen, H., and Cao, S. (2010). Development of a convenient immunochromatographic strip for the diagnosis of infection with Japanese encephalitis virus in swine. *Journal of virological methods,* 168(1-2), 51–56. doi: 10.1016/j.jviromet.2010.04.015.
103. Lindahl, J., Boqvist, S., Ståhl, K., Thu, H.T.V., and Magnusson, U. (2012). Reproductive performance in sows in relation to Japanese Encephalitis Virus seropositivity in an endemic area. *Tropical animal health and production*, 44, 239–245. doi: 10.1007/s11250-011-0005-0.
104. Lindahl, J.F., Ståhl, K., Chirico, J., Boqvist, S., Thu, H.T.V., and Magnusson, U. (2013). Circulation of Japanese Encephalitis virus in pigs and mosquito vectors within Can Tho city, Vietnam. *PLoS neglected tropical diseases*, 7(4), e2153. doi: 10.1371/journal.pntd.0002153.
105. Liu, H., Lu, H.J., Liu, Z.J., Jing, J., Ren, J.Q., Liu, Y.Y., Guo, H.H., Fan, M., Lu, H.J., and Jin, N.Y. (2012). Reverse transcription loop-mediated isothermal amplification for rapid detection of Japanese encephalitis virus in swine and mosquitoes. *Vector-borne and zoonotic diseases*, 12(12), 3861–3869. doi: 10.3923/javaa.2012.3861.3869.
106. Liu, H., Lu, H.J., Liu, Z.J., Jing, J., Ren, J.Q., Liu, Y.Y., Lu, F., and Jin, N.Y. (2013). Japanese encephalitis virus in mosquitoes and swine in Yunnan province, China 2009–2010. *Vector-borne and zoonotic diseases*, 13(1), 41–49. doi: 10.1089/vbz.2012.1016.
107. Lopez, A.L., Aldaba, J.G., Roque Jr, V.G., Tandoc III, A.O., Sy, A.K., Espino, F.E., De Quiroz-Castro, M., Jee, Y., Ducusin, M.J., and Fox, K.K. (2015). Epidemiology of Japanese encephalitis in the Philippines: a systematic review. *PLoS neglected tropical diseases,* 9(3), p.e0003630.
108. Lyons, A.C., Huang, Y.J.S., Park, S.L., Ayers, V.B., Hettenbach, S.M., Higgs, S., McVey, D.S., Noronha, L., Hsu, W.W., and Vanlandingham, D.L. (2018). Shedding of Japanese encephalitis virus in oral fluid of infected swine. *Vector-borne and zoonotic diseases,* 18(9), 469–474. doi: 10.1089/vbz.2018.2283.
109. Maeda, O., Takenokuma, K., Karoji, Y., Kuroda, A., Sasaki, O., Karaki, T., and Ishii, T. (1978). Epidemiological-studies on Japanese encephalitis in Kyoto-city area, Japan .4. Natural infection in sentinel pigs. *Japanese journal of medical science and biology,* 31(4), 317–324. doi: 10.7883/yoken1952.31.317.
110. Makino, Y., Saito, M., Phommasack, B., Vongxay, P., Kanemura, K., Pothawan, T., Boun, S., Insisiengmay, S., Som, P., and Fukunaga, T. (1994). Arbovirus infections in pilot areas in Laos. *Tropical medicine,* 36(4), 131–139.
111. Mall, M.P., Kumar, A., and Malik, S.V. (1995). Sero-positivity of domestic animals against Japanese encephalitis in Bareilly area, U.P. *The Journal of communicable diseases*, 27(4), 242–246.
112. Meiklejohn, G., Simpson, T.W., and Stacy, I.B. (1947). Experimental infection of domestic animals with Japanese B encephalitis virus. *Proceedings of the Society for Experimental Biology and Medicine,* 65(2), 359–364. doi: 10.3181/00379727-65-15959.
113. Myint, L., Oo., K., Hlaing, W., Thu, H.M., Thant, K.Z., Than, S.M., Aye, K.T., Oo, S.W., Ha, T., Moe, K., and Thein, S. (2000). Investigation of Japanese encephalitis virus infection in Bogalay township, Myanmar in 1999. *Tropical medicine,* 42(2), 47–52.
114. Nam, J., Chae, S., and Cho, H. (2002). Immunogenicity of a recombinant MVA and a DNA vaccine for Japanese encephalitis virus in swine. *Microbiology and immunology,* 46(1), 23–28. doi: 10.1111/j.1348-0421.2002.tb02672.x.
115. Nandi, A.K., Mukherjee, K.K., Chakravarti, S.K., and Chakraborty, M.S. (1982). Activity of Japanese encephalitis virus among certain domestic animals in West Bengal. *Indian journal of medical research,* 76, 499–503.
116. Niazmand, M.H., Hirai, T., Ito, S., Habibi, W.A., Noori, J., Hasheme, R., and Yamaguchi, R. (2019). Causes of death and detection of antibodies against Japanese encephalitis virus in Misaki feral horses (*Equus caballus*) in Southern Japan, 2015–17. *Journal of wildlife diseases,* 55(4), 804–811. doi: 10.7589/2018-10-265.
117. Nidaira, M., Taira, K., Itokazu, K., Kudaka, J., Nakamura, M., Ohno, A., and Takasaki, T. (2007a). Survey of the antibody against Japanese encephalitis virus in Ryukyu wild boars (*Sus scrofa riukiuanus*) in Okinawa, Japan. *Japanese journal of infectious diseases,* 60(5), 309–311.
118. Nidaira, M., Taira, K., Onodera, I., Morikawa, T., Itokazu, K., Kudaka, J., and Ohno, A. (2007b). Detection of Japanese encephalitis virus antibody in a pig on Yonaguni Island, where all pigs were slaughtered in 1997. *Japanese journal of infectious diseases,* 60(1), 70–71.
119. Nidaira, M., Taira, K., Okano, S., Shinzato, T., Morikawa, T., Tokumine, M., Asato, Y., Tada, Y., Miyagi, K., Matsuda, S., and Itokazu, K. (2009). Survey of Japanese encephalitis virus in pigs on Miyako, Ishigaki, Kume, and Yonaguni Islands in Okinawa, Japan. *Japanese journal of infectious diseases*, 62(3), 220–224.
120. Nidaira, M., Kyan, H., Taira, K., Okano, S., Oshiro, T., Kato, T., Kudo, N., Azama, Y., Mahoe, Y., Kudaka, J., and Tamanaha, K. (2014). Survey of Japanese encephalitis virus in pigs and wild boars on Ishigaki and Iriomote islands in Okinawa, Japan. *Epidemiology & Infection,* 142(4), 856–860. doi: 10.1017/S0950268813001611.
121. Nie, M., Zhou, Y., Li, F., Deng, H., Zhao, M., Huang, Y., Jiang, C., Sun, X., Xu, Z., and Zhu, L. (2022). Epidemiological investigation of swine Japanese encephalitis virus based on RT-RAA detection method. *Scientific reports*, 12(1), 9392. doi: 10.1038/s41598-022-13604-4.
122. Nitatpattana, N., Dubot-Pérès, A., Gouilh, M.A., Souris, M., Barbazan, P., Yoksan, S., De Lamballerie, X., and Gonzalez, J.P. (2008). Change in Japanese encephalitis virus distribution, Thailand. *Emerging infectious diseases,* 14(11), 1762–1765. doi: 10.3201/eid1411.080542.
123. Nitatpattana, N., Le Flohic, G., Thongchai, P., Nakgoi, K., Palaboodeewat, S., Khin, M., Barbazan, P., Yoksan, S., and Gonzalez, J.P. (2011). Elevated Japanese encephalitis virus activity monitored by domestic sentinel piglets in Thailand. *Vector-borne and zoonotic diseases*, 11(4), 391–394. doi: 10.1089/vbz.2010.0035.
124. Obara, M., Yamauchi, T., Watanabe, M., Hasegawa, S., Ueda, Y., Matsuno, K., Iwai, M., Horimoto, E., Kurata, T., Takizawa, T., and Kariwa, H. (2011). Continuity and change of Japanese encephalitis virus in Toyama Prefecture, Japan. *The American journal of tropical medicine and hygiene*, 84(5), 695–708. doi: 10.4269/ajtmh.2011.10-0188.
125. Oda, K., Igarashi, A., Kheong, C.T., Hong, C.C., Vijayamalar, B., Sinniah, M., Hassan, S.S., and Tanaka, H. (1996). Cross-sectional serosurvey for Japanese encephalitis specific antibody from animal sera in Malaysia 1993. *The Southeast Asian journal of tropical medicine and public health,* 27(3), 463–470.
126. Oliveira, A.R.S., Cohnstaedt, L.W., Strathe, E., Hernández, L.E., McVey, D.S., Piaggio, J., and Cernicchiaro, N. (2017). Meta-analyses of the proportion of Japanese encephalitis virus infection in vectors and vertebrate hosts. *Parasites & vectors,* 10, 1-15. doi: 10.1186/s13071-017-2354-7.
127. Oliveira, A.R.S., Strathe, E., Etcheverry, L., Cohnstaedt, L.W., McVey, D.S., Piaggio, J., and Cernicchiaro, N. (2018b.) Assessment of data on vector and host competence for Japanese encephalitis virus: A systematic review of the literature. *Preventive veterinary medicine,* 154, 71-89. doi: 10.1016/j.prevetmed.2018.03.018.
128. Ogata, M., Nagao, Y., Jitsunari, F., Kikui, R., and Kitamura, N. (1970). Vaccination with complete adjuvant-added inactivated virus vaccine of Japanese encephalitis to swine for preventing viremia (with specific reference to the effect of vaccination on viremia; epidemiological study on Japanese encephalitis. 35). *Acta Medicinae Okayama,* 24(6), 579–587.
129. Ogata, M., Nagao, Y., Jitsunari, F., and Kitamura, N. (1969). Vaccination with complete adjuvant-added inactivated virus vaccine of Japanese encephalitis to swine, rabbits and chicks for preventing viremia (epidemiological study on Japanese encephalitis 25). *Acta Medicinae Okayama,* 23(6), 541-551.
130. Ogata, M., Nagao, Y., Kikui, R., Kitamura, N., and Ariyasu, H. (1971). Effect of complete adjuvant on vaccination of live attenuated Japanese encephalitis vaccine to swine for preventing viremia. 39. Epidemiological studies of JE. *Acta Medicinae Okayama*, 25(1), 71–75.
131. Ogawa, H., Taira, O., Hirai, T., Takeuchi, H., Nagao, A., Ishikawa, Y., Tuchiya, K., Nunoya, T., and Ueda, S. (2009). Multiplex PCR and multiplex RT-PCR for inclusive detection of major swine DNA and RNA viruses in pigs with multiple infections. *Journal of virological methods,* 160(1-2), 210–214. doi: 10.1016/j.jviromet.2009.05.010.
132. Ohkubo, Y., Takashima, I., Hashimoto, N., and Fujita, I. (1984). Enzyme-linked immunosorbent assay (ELISA) for detection of IgM and IgG antibodies to Japanese encephalitis virus in sera from experimentally infected swine. *The Japanese journal of veterinary science,* 46(1), 57–64.
133. Ohkubo, Y., Takashima, I., and Hashimoto, N. (1984). Application of ELISA to sero-epidemiological survey of Japanese encephalitis in swine*. The Japanese journal of veterinary research,* 32(4), 191–197.
134. Ohno, Y., Sato, H., Suzuki, K., Yokoyama, M., Uni, S., Shibasaki, T., Sashika, M., Inokuma, H., Kai, K., and Maeda, K. (2009). Detection of antibodies against Japanese encephalitis virus in raccoons, raccoon dogs and wild boars in Japan. *Journal of veterinary medical science,* 71(8), 1035–1039. doi: 10.1292/jvms.71.1035.
135. Okuno, T., Mitchell, C.J., Chen, P.S., Wang, J.S., and Lin, S.Y. (1973). Seasonal infection of Culex mosquitos and swine with Japanese encephalitis virus. *Bulletin of the World Health Organization,* 49(4), 347–352.
136. Pantawane, P.B., Dhanze, H., Ravi Kumar, G.V.P.P.S., Grace, M.R., Dudhe, N. C., and Bhilegaonkar, K.N. (2019). TaqMan real-time RT-PCR assay for detecting Japanese encephalitis virus in swine blood samples and mosquitoes. *Animal biotechnology,* 30(3), 267–272. doi: 10.1080/10495398.2018.1481417.
137. Pant, G.R. (2006). A serological survey of pigs, horses, and ducks in Nepal for evidence of infection with Japanese encephalitis virus. *Annals of the New York Academy of Sciences,* 1081(1), 124–129. doi: 10.1196/annals.1373.013.
138. Pant, G.R., Lunt, R.A., Rootes, C.L., and Daniels, P.W. (2006). Serological evidence for Japanese encephalitis and West Nile viruses in domestic animals of Nepal. *Comparative immunology, microbiology and infectious diseases*, 29(2-3), 166–175. doi: 10.1016/j.cimid.2006.03.003.
139. Park, S.L., Huang, Y.J.S., Lyons, A.C., Ayers, V.B., Hettenbach, S.M., McVey, D.S., Burton, K.R., Higgs, S., and Vanlandingham, D.L. (2018). North American domestic pigs are susceptible to experimental infection with Japanese encephalitis virus. *Scientific reports,* 8(1), 7951. doi: 10.1038/s41598-018-26208-8.
140. Paul, W.S., Moore, P.S., Karabatsos, N., Flood, S.P., Yamada, S., Jackson, T., and Tsai, T.F., (1993). Outbreak of Japanese encephalitis on the island of Saipan, 1990. *Journal of Infectious Diseases,* 167(5), 1053–1058. doi: 10.1093/infdis/167.5.1053.
141. Peiris, J.S.M., Amerasinghe, F.P., Amerasinghe, P.H., Ratnayake, C.B., Karunaratne, S.H.P.P., and Tsai, T.F. (1992). Japanese encephalitis in Sri Lanka-the study of an epidemic: Vector incrimination, porcine infection and human disease. *Transactions of the Royal Society of Tropical Medicine and Hygiene,* 86(3), 307–313. doi: 10.1016/0035-9203(92)90325-7.
142. Peiris, J.S.M., Arunagiri, C.K., Perera, L.P., Ratnayake, C.B., Amerasinghe, F.P., Karunaratne, S.H.P.P., Ratnayake, C.B., Kulatilaka, T.A., and Abeysinghe, M.R.N. (1993). Japanese encephalitis in Sri Lanka: comparison of vector and virus ecology in different agro-climatic areas. *Transactions of the Royal Society of Tropical Medicine and Hygiene,* 87(5), 541–548. doi: 10.1016/0035-9203(93)90080-A.
143. Pyke, A.T., Williams, D.T., Nisbet, D.J., van den Hurk, A.F., Taylor, C.T., Johansen, C.A., Johansen, C.A., Macdonald, J., Hall, R.A., Simmons, R.J., Mason, R.J., and Lee, J.M. (2001). The appearance of a second genotype of Japanese encephalitis virus in the Australasian region. *American Journal of Tropical Medicine and Hygiene,* 65(6), 747–753. doi: 10.4269/ajtmh.2001.65.747.
144. Pyke, A.T., Smith, I.L., van den Hurk, A.F., Northill, J.A., Chuan, T.F., Westacott, A.J., and Smith, G.A. (2004). Detection of Australasian Flavivirus encephalitic viruses using rapid fluorogenic TaqMan RT-PCR assays*. Journal of virological methods,* 117(2), 161–167. doi: 10.1016/j.jviromet.2004.01.007.
145. Rao, P., Wu, H., Jiang, Y., Opriessnig, T., Zheng, X., Mo, Y., and Yang, Z. (2014). Development of an EvaGreen-based multiplex real-time PCR assay with melting curve analysis for simultaneous detection and differentiation of six viral pathogens of porcine reproductive and respiratory disorder. *Journal of virological methods,* 208, 56–62. doi: 10.1016/j.jviromet.2014.06.027.
146. Ratho, R.K., Sethi, S., and Prasad, S.R. (1999). Prevalence of Japanese encephalitis and West Nile viral infections in pig population in and around Chandigarh. *The Journal of communicable diseases,* 31(2), 113–116.
147. Raut, A.A., Aasdev, A., Mishra, A., Dutta, B., Bharali, A., Konwar, N., Dubey, C.K., Chingtham, S., Pawar, S.D., Raghuvanshi, R., and Sakhrie, A. (2021). Detection of coinfection of a divergent subgroup of genotype I Japanese encephalitis virus in multiple classical swine fever virus outbreaks in pigs of Assam, India. *Transboundary and emerging diseases*, 68(4), 2622–2627. doi: 10.1111/tbed.13903.
148. Redant, V., Favoreel, H.W., Dallmeier, K., Van Campe, W., and De Regge, N. (2020). Efficient control of Japanese encephalitis virus in the central nervous system of infected pigs occurs in the absence of a pronounced inflammatory immune response. *Journal of neuroinflammation,* 17, 315. doi: 10.1186/s12974-020-01974-3.
149. Redant, V., Favoreel, H.W., Dallmeier, K., Van Campe, W., and De Regge, N. (2022). Japanese encephalitis virus persistence in porcine tonsils is associated with a weak induction of the innate immune response, an absence of IFNγ mRNA expression, and a decreased frequency of CD4+CD8+ double-positive T cells. *Frontiers in Cellular and Infection Microbiology,* 12, 834888. doi: 10.3389/fcimb.2022.834888.
150. Riad, M.H., Scoglio, C.M., McVey, D.S., and Cohnstaedt, L.W. (2017). An individual-level network model for a hypothetical outbreak of Japanese encephalitis in the USA. *Stochastic environmental research and risk assessment,* 31, 353–367. doi: 10.1007/s00477-016-1353-0.
151. Ricklin, M.E., García-Nicolás, O., Brechbühl, D., Python, S., Zumkehr, B., Nougairede, A., Charrel, R.N., Posthaus, H., Oevermann, A., and Summerfield, A. (2016a). Vector-free transmission and persistence of Japanese encephalitis virus in pigs. *Nature communications,* 7(1), 10832. doi: 10.1038/ncomms10832.
152. Ricklin, M.E., Garcìa-Nicolàs, O., Brechbühl, D., Python, S., Zumkehr, B., Posthaus, H., Oevermann, A., and Summerfield, A. (2016b). Japanese encephalitis virus tropism in experimentally infected pigs. *Veterinary research,* 47, 34. doi: 10.1186/s13567-016-0319-z.
153. Rodrigues, F.M., Vidyasagar, J., Bright Singh, P., Ghosh, S.N., Guttikar, S.N., Joshi, M.V., and Gupta, N.P. (1976). The 1973 epidemic of Japanese encephalitis in West Bengal: a serological survey of domestic animals. *The Indian journal of medical research,* 64(7), 973–980.
154. Ruget, A.-S., Beck, C., Gabassi, A., Trevennec, K., Lecollinet, S., Chevalier, V., and Cappelle, J. (2018). Japanese encephalitis circulation pattern in swine of northern Vietnam and consequences for swine’s vaccination recommendations. *Transboundary and emerging diseases,* 65(6), 1485–1492. doi: 10.1111/tbed.12885.
155. Sasaki, O., Karoji, Y., Kuroda, A., Karaki, T., Takenokuma, K., and Maeda, O. (1982). Protection of pigs against mosquito-borne Japanese encephalitis-virus by immunization with a live attenuated vaccine. *Antiviral research,* 2(6), 355–360. doi: 10.1016/0166-3542(82)90005-5.
156. Sazawa, H., Sugimori, T., Morimoto, T., Miura, Y., and Watanabe, M. (1969a). Response of swine to an attenuated strain of Japanese encephalitis virus obtained by passage in bovine kidney cell cultures. *National Institute of Animal Health Quarterly,* 9(2), 74-82.
157. Sazawa, H., Sugimori, T., Morimoto, T., and Miura, Y. (1969b). Antibody response in piglets by simultaneous inoculation with attenuated viruses of Japanese encephalitis and hog cholera. *National Institute of Animal Health Quarterly,* 9(2), 112–113.
158. Scherer, W.F., Moyer, J.T., and Izumi, T. (1959). Immunologic studies of Japanese encephalitis virus in Japan. V. Maternal antibodies, antibody responses and viremia following infection of swine. *The Journal of Immunology,* 83(6), 620–626.
159. Scherer, W.F., Moyer, J.T., Izumi, T., Gresser, I., and McCown, J. (1959). Ecologic studies of Japanese encephalitis virus in Japan. VI. Swine Infection. *The American journal of tropical medicine and hygiene,* 8(6), 698–706. doi: 10.4269/ajtmh.1959.8.698.
160. See, E., Tan, H.C., Wang, D., Ooi, E.E., and Lee, M.A. (2002). Presence of hemagglutination inhibition and neutralization antibodies to Japanese encephalitis virus in wild pigs on an offshore island in Singapore. *Acta tropica,* 81(3), 233–236. doi: 10.1016/S0001-706X(01)00212-1.
161. Sheng, Z., Gao, N., Cui, X., Fan, D., Chen, H., Wu, N., Wei, J., and An. J. (2016). Electroporation enhances protective immune response of a DNA vaccine against Japanese encephalitis in mice and pigs. *Vaccine,* 34(47), 5751–5757. doi: 10.1016/j.vaccine.2016.10.001.
162. Shimizu, T., Kawakami, Y., Fukuhara, S., and Matumoto, M. (1954). Experimental stillbirth in pregnant swine infected with Japanese encephalitis virus. *The Japanese journal of experimental medicine,* 24(6), 363–375.
163. Simpson, D.I.H., Bowen, E.T.W., Platt, G.S., Way, H., Smith, C.E.G., Peto, S., Kamath, S., Lim, B.L., and Lim, T.W. (1970). Japanese encephalitis in Sarawak: virus isolation and serology in a Land Dyak village. *Transactions of the Royal Society of Tropical Medicine and Hygiene*, 64(4), 503–510. doi: 10.1016/0035-9203(70)90070-2.
164. Simpson, D.I.H., Smith, C.E.G., Marshall, T.D.C., Platt, G.S., Way, H.J., Bowen, E.T.W., Bright, W.F., Day, J., McMahon, D.A., Hill, M.N., and Bendell, P.J.E. (1976). Arbovirus infections in Sarawak: the role of the domestic pig. *Transactions of the Royal Society of Tropical Medicine and Hygiene,* 70(1), 66–72. doi: 10.1016/0035-9203(76)90010-9.
165. Singh, G., and Rao, T.R. (1988). Prevalence of Japanese encephalitis virus infection in pigs in parts of southern India. *The Indian journal of medical research*, 87, 117–126.
166. Sugiyama, I., Shimizu, E., Nogami, S., Suzuki, K., Miura, Y., and Sentsui, H. (2009). Serological survey of arthropod-borne viruses among wild boars in Japan. *Journal of veterinary medical science*, 71(8), 1059–1061. doi: 10.1292/jvms.71.1059.
167. Suresh, K.P., Nayak, A., Dhanze, H., Bhavya, A.P., Shivamallu, C., Achar, R.R., Silina, E., Stupin, V., Barman, N.N., Kumar, S.K., and Syed, A. (2022). Prevalence of Japanese encephalitis (JE) virus in mosquitoes and animals of the Asian continent: A systematic review and meta-analysis*. Journal of Infection and Public Health,* 15(9), 942-949.
168. Tadano, M., Kanemura, K., Makino, Y., Fukunaga, T., and Hasegawa, H. (1994). Epidemiological and ecological studies of Japanese encephalitis in Okinawa, subtropical area in Japan. I. Investigations on antibody levels to Japanese encephalitis virus in swine sera and vector mosquito in Okinawa, Miyako and Ishigaki islands. *Microbiology and immunology*, 38(2), 117–122. doi: 10.1111/j.1348-0421.1994.tb01752.x.
169. Takashima, I., Watanabe, T., Ouchi, N., and Hashimoto, N. (1988). Ecological studies of Japanese encephalitis virus in Hokkaido: interepidemic outbreaks of swine abortion and evidence for the virus to overwinter locally. *The American journal of tropical medicine and hygiene*, 38(2), 420–427. doi: 10.4269/ajtmh.1988.38.420.
170. Teng, M., Luo, J., Fan, J.M., Chen, L., Wang, X.T., Yao, W., Wang, C.Q., and Zhang, G.P. (2013). Molecular characterization of Japanese encephalitis viruses circulating in pigs and mosquitoes on pig farms in the Chinese province of Henan. *Virus genes,* 46, 170–174. doi: 10.1007/s11262-012-0813-y.
171. Thakur, K.K., Pant, G.R., Wang, L., Hill, C.A., Pogranichniy, R.M., Manandhar, S., and Johnson, A.J. (2012). Seroprevalence of Japanese encephalitis virus and risk factors associated with seropositivity in pigs in four mountain districts in Nepal*. Zoonoses and public health,* 59(6), 393–400. doi: 10.1111/j.1863-2378.2012.01456.x.
172. Thein, S., Aung, H., and Sebastian, A.A. (1988). Study of vector, amplifier, and human infection with Japanese encephalitis virus in a Rangoon community. *American journal of epidemiology,* 128(6), 1376–1382. doi: 10.1093/oxfordjournals.aje.a115090.
173. Tian, C.J., Lin, Z.X., He, X.M., Luo, Q., Luo, C.B., Yu, H.Q., Chen, R., Wu, X.W., Zhu, D.Z., Ren, Z.J., and Bi, Y.Z. (2012). Development of a fluorescent-intercalating-dye-based reverse transcription loop-mediated isothermal amplification assay for rapid detection of seasonal Japanese B encephalitis outbreaks in pigs. *Archives of virology*, 157, 1481–1488. doi: 10.1007/s00705-012-1330-y.
174. Ting, S.H.L., Tan, H.C., Wong, W.K., Ng, M.L., Chan, S.H., and Ooi, E.E. (2004). Seroepidemiology of neutralizing antibodies to Japanese encephalitis virus in Singapore: continued transmission despite abolishment of pig farming? *Acta tropica,* 92(3), 187–191. doi: 10.1016/j.actatropica.2004.04.010.
175. Ueba, N., Kimura, T., Nakajima, S., Kurimura, T., and Kitaura, T. (1978). Field experiments on live attenuated Japanese encephalitis virus vaccine for swine. *Biken journal,* 21(3), 95–103.
176. Ueba, N., Maeda, A., Otsu, K., Mitsuda, B., Kimoto, T., Fujito, S., and Kunita, N. (1972). Natural infections of swine by Japanese encephalitis-virus and its modification by vaccination. *Biken journal,* 15(2), 67-79.
177. Unita, T. (1969). Ecological studies of Japanese encephalitis virus in Mie Prefecture. I. Viremia in naturally infected pigs and viremic mosquitoes. *Mie Medical Journal*, 19(1), 81–87.
178. Van Peenen, P.F.D., Joseph, S.W., Atmosoedjono, S., Irsiana, R., and Saaroni, O. (1974). Group B arbovirus antibodies in sentinel pigs near Jakarta, Indonesia. *The Southeast Asian journal of tropical medicine and public health*, 5(1), 1–3.
179. Van Peenen, P.F.D., Joseph, P.L., Atmosoedjono, S., Irsiana, R., and Saroso, J.S. (1975). Japanese encephalitis virus from pigs and mosquitoes in Jakarta, Indonesia. *Transactions of the Royal Society of Tropical Medicine and Hygiene*, 69(5-6), 477–479. doi: 10.1016/0035-9203(75)90102-9.
180. Wada, Y. (1975). Theoretical considerations on the epidemic of Japanese encephalitis. *Tropical medicine,* 16(4), 171–199.
181. Wada, Y., Oda, T., and Mogi, M. (1975). Ecology of Japanese encephalitis virus in Japan. II. The population of vector mosquitoes and the epidemic of Japanese encephalitis. *Tropical medicine,* 17(3), 111–127.
182. Wang, X., Guo, S., Hameed, M., Zhang, J., Pang, L., Li, B., Qiu, Y., Liu, K., Shao, D., Ma, Z., and Zhong, D. (2020). Rapid differential detection of genotype I and III Japanese encephalitis virus from clinical samples by a novel duplex TaqMan probe-based RT-qPCR assay. *Journal of virological methods,* 279, 113841. doi: 10.1016/j.jviromet.2020.113841.
183. Williams, D.T., Daniels, P.W., Lunt, R.A., Wang, L.F., Newberry, M.K., and Mackenzie, J.S. (2001). Experimental infections of pigs with Japanese encephalitis virus and closely related Australian flaviviruses. *American Journal of Tropical Medicine and Hygiene*, 65(4), 379–387.
184. Wu, H., Rao, P., Jiang, Y., Opriessnig, T., and Yang, Z. (2014). A sensitive multiplex real-time PCR panel for rapid diagnosis of viruses associated with porcine respiratory and reproductive disorders. *Molecular and cellular probes*, 28(5-6), 264–270. doi: 10.1016/j.mcp.2014.07.001.
185. Wu, R., Wang, Q., Liu, H., Chai, C., He, B., Huang, X., Wen, Y., Wen, X., Yan, Q., Ma, X., and Cao, S. (2016). Phylogenetic analysis reveals that Japanese encephalitis virus genotype III is still prevalent in swine herds in Sichuan province in China. *Archives of virology*, 161, 1719–1722. doi: 10.1007/s00705-016-2814-y.
186. Wu, X., Lin, H., Chen, S., Xiao, L., Yang, M., An, W., Wang, Y., Yao, X., and Yang, Z. (2017). Development and application of a reverse transcriptase droplet digital PCR (RT-ddPCR) for sensitive and rapid detection of Japanese encephalitis virus. *Journal of virological methods*, 248, 166–171. doi: 10.1016/j.jviromet.2017.06.015.
187. Wu, Y., Wu, X., Chen, J., Hu, J., Huang, X., and Zhou, B. (2020). A novel protein chip for simultaneous detection of antibodies against four epidemic swine viruses in China. *BMC veterinary research,* 16, 162. doi: 10.1186/s12917-020-02375-7.
188. Xiao, C., Li, C., Di, D., Cappelle, J., Liu, L., Wang, X., Pang, L., Xu, J., Liu, K., Li, B., and Shao, D. (2018). Differential replication efficiencies between Japanese encephalitis virus genotype I and III in avian cultured cells and young domestic ducklings. *PLoS neglected tropical diseases*, 12(12), e0007046. doi: 10.1371/journal.pntd.0007046.
189. Xiao, L., Wang, Y., Kang, R., Wu, X., Lin, H., Ye, Y., Yu, J., Ye, J., Xie, J., Cao, Y., and Wei, Y. (2018). Development and application of a novel Bio–Plex suspension array system for high–throughput multiplexed nucleic acid detection of seven respiratory and reproductive pathogens in swine. *Journal of virological methods,* 261, 104–111. doi: 10.1016/j.jviromet.2018.08.017.
190. Xie, S., Pan, J., Zhang, Q., Guan, R., Yang, X., Yang, X., Liang, Z., and Cao, R. (2022). Japanese Encephalitis Virus (JEV) NS1’ enhances the viral infection of dendritic cells (DCs) and macrophages in pig tonsils. *Microbiology Spectrum,* 10(4), e01147-22 doi: 10.1128/spectrum.01147-22.
191. Xinglin, J., Huanchun, C., Qigai, H., Xiang, W., Bin, W., Dexin, Q., and Liurong, F. (2002). The development and application of the latex agglutination test to detect serum antibodies against Japanese encephalitis virus. *Veterinary research communications,* 26, 495–503. doi: 10.1023/A:1020546626694.
192. Xinglin, J., Huanchun, C., Xiang, W., and Changming, Q. (2005). Quantitative and qualitative study of enzyme-linked immunosorbent assay to detect IgG against Japanese encephalitis virus in swine sera. *Veterinary research communications,* 29, 159–169. doi: 10.1023/B:VERC.0000047485.85866.6e.
193. Xu, G., Xu, X., Li, Z., He, Q., Wu, B., Sun, S., and Chen, H. (2004). Construction of recombinant pseudorabies virus expressing NS1 protein of Japanese encephalitis (SA14-14-2) virus and its safety and immunogenicity. *Vaccine,* 22(15-16), 1846–1853. doi: 10.1016/j.vaccine.2003.09.015.
194. Xu, X.G., Wang, Z.S., Zhang, Q., Li, Z.C., Zhao, H.N., Li, W., Tong, D.W., and Liu, H.J. (2011). Baculovirus surface display of E envelope glycoprotein of Japanese encephalitis virus and its immunogenicity of the displayed proteins in mouse and swine models. *Vaccine,* 29(4), 636–643. doi: 10.1016/j.vaccine.2010.11.045.
195. Xu, X.G., Chen, G.D., Huang, Y., Ding, L., Li, Z.C., Chang, C.-D., Wang, C.Y., Tong, D.W., and Liu, H.J. (2012). Development of multiplex PCR for simultaneous detection of six swine DNA and RNA viruses. *Journal of virological methods,* 183(1), 69–74. doi: 10.1016/j.jviromet.2012.03.034.
196. Yamada, M., Nakamura, K., Yoshii, M., and Kaku, Y. (2004). Nonsuppurative encephalitis in piglets after experimental inoculation of Japanese encephalitis flavivirus isolated from pigs. *Veterinary Pathology,* 41(1), 62–67. doi: 10.1354/vp.41-1-62.
197. Yamada, M., Nakamura, K., Yoshii, M., Kaku, Y., and Narita, M. (2009). Brain lesions induced by experimental intranasal infection of Japanese encephalitis virus in piglets. *Journal of comparative pathology,* 141(2-3), 156–162. doi: 10.1016/j.jcpa.2009.04.006.
198. Yamada, T., Rojanasuphot, S., Takagi, M., Wungkobkiat, S., and Hirota, T. (1971). Studies on an epidemic of Japanese encephalitis in the northern region of Thailand in 1969 and 1970. *Biken journal,* 14(3), 267–296.
199. Yamamoto, H.A., Ishida, N., Akiyama, K., Shiratori, T., and Konno, J. (1970). Epidemiological analyses of Japanese encephalitis virus spread from mosquitoes to pigs through 5 years. *Japanese journal of medical science and biology*, 23(2), 75–85. doi: 10.7883/yoken1952.23.75.
200. Yamanaka, A., Mulyatno, K.C., Susilowati, H., Hendrianto, E., Utsumi, T., Amin, M., Lusida, M.I., Soegijanto, S., and Konishi, E. (2010). Prevalence of antibodies to Japanese encephalitis virus among pigs in Bali and East Java, Indonesia, 2008. *Japanese journal of infectious diseases,* 63(1), 58–60.
201. Yamaoka, M., Konishi, E., and Matsumura, T. (1982). Use of enzyme-linked immunosorbent assay for detection of IgM antibodies to Japanese encephalitis virus in swine sera. *The Kobe journal of the medical sciences*, 28(4), 143–153.
202. Yamaoka, M. (1983). Enzyme-linked immunosorbent assay for detection of IgG and IgM class antibodies to Japanese encephalitis virus. *The Kobe journal of the medical sciences*, 29(6), 197–226.
203. Yamaoka, M., and Konishi, E. (1985). Recent changes in prevalence pattern of Japanese encephalitis virus in Hyogo prefecture, Japan, using a two‐dimensional distribution of IgG and IgM class antibody levels in swine sera. *Journal of medical virology*, 17(1), 1–7. doi: 10.1002/jmv.1890170102.
204. Yang, D.K., Kim, B.H., Kweon, C.H., Kwon, J.H., Lim, S.I., and Han, H.R. (2004a). Biophysical characterization of Japanese encephalitis virus (KV1899) isolated from pigs in Korea. *Journal of veterinary science*, 5(2), 125–130. doi: 10.4142/jvs.2004.5.2.125.
205. Yang, D.K., Kweon, C.H., Kim, B.H., Lim, S.I., Kim, S.H., Kwon, J.H., and Han, H.R. (2004b). TaqMan reverse transcription polymerase chain reaction for the detection of Japanese encephalitis virus. *Journal of veterinary science,* 5(4), 345–351. doi: 10.4142/jvs.2004.5.4.345.
206. Yang, D.K., Kim, B.H., Kweon, C.H., Kwon, J.H., Lim, S.I., and Han, H.R. (2004c). Molecular characterization of full-length genome of Japanese encephalitis virus (KV1899) isolated from pigs in Korea. *Journal of veterinary science*, 5(3), 197–205. doi: 10.4142/jvs.2004.5.3.197.
207. Yang, D.K., Kim, B.H., Lim, S.I., Kwon, J.H., Lee, K.W., Choi, C.U., and Kweon, C.H. (2006). Development and evaluation of indirect ELISA for the detection of antibodies against Japanese encephalitis virus in swine. *Journal of veterinary science*, 7(3), 271–275. doi: 10.4142/jvs.2006.7.3.271.
208. Yang, D.K., Kim, H.H., Hyun, B.H., Lim, S.I., Nam, Y.K., Nah, J.J., and Song, J.Y. (2012). Detection of neutralizing antibody against Japanese encephalitis virus in wild boars of Korea. *Journal of Bacteriology and Virology,* 42(4), 353–356. doi: 10.4167/jbv.2012.42.4.353.
209. Yang, D.K., Kim, H.H., Jo, H.Y., Lee, S.H., Jang, S.H., Lee, S.O., Choi, S.S., and Cho, I.S. (2017). Improvement of indirect enzyme-linked immunosorbent assay for detection of Japanese encephalitis virus antibodies in swine sera. *Korean Journal of Veterinary Research,* 57(1), 31–36. doi: 10.14405/kjvr.2017.57.1.31.
210. Yang, L., Xiao, A., Wang, H., Zhang, X., Zhang, Y., Li, Y., Wei, Y., Liu, W., and Chen, C. (2022). A VLP-based vaccine candidate protects mice against Japanese encephalitis virus infection. *Vaccines,* 10(2), 197. doi: 10.3390/vaccines10020197.
211. Yang, Z., Wu, R., Li, R.W., Li, L., Xiong, Z., Zhao, H., Guo, D., and Pan, Z. (2012). Chimeric classical swine fever (CSF)-Japanese encephalitis (JE) viral replicon as a non-transmissible vaccine candidate against CSF and JE infections. *Virus research,* 165(1), 61–70. doi: 10.1016/j.virusres.2012.01.007.
212. Yap, G., Lim, X.F., Chan, S., How, C.B., Humaidi, M., Yeo, G., Mailepessov, D., Kong, M., Lai, Y.L., Okumura, C., and Ng, L.C. (2019). Serological evidence of continued Japanese encephalitis virus transmission in Singapore nearly three decades after end of pig farming. *Parasites & vectors,* 12. doi: 10.1186/s13071-019-3501-0.
213. Yonemitsu, K., Minami, S., Noguchi, K., Kuwata, R., Shimoda, H., and Maeda, K. (2019). Detection of anti-viral antibodies from meat juice of wild boars. *Journal of veterinary medical science*, 81(1), 155–159. doi: 10.1292/jvms.18-0576.
214. Yoshida, I., Takagi, M., Inokuma, E., Goda, H., Ono, K., Takaku, K., Oku, J., Kunita, N., Amano, T., and Okuno, Y. (1981). Establishment of an attenuated ML-17 strain of Japanese encephalitis virus. *Biken journal,* 24(1), 47–67.
215. Yoshida, Y., Tabei, Y., Hasegawa, M., Nagashima, M., and Morozumi, S. (2005). Genotypic analysis of Japanese encephalitis virus strains isolated from swine in Tokyo, Japan. *Japanese journal of infectious diseases*, 58(4), 259–261.
216. Yoshikawa, A., Nabeshima, T., Inoue, S., Agoh, M., and Morita, K. (2016). Molecular and serological epidemiology of Japanese encephalitis virus (JEV) in a remote island of western Japan: an implication of JEV migration over the East China Sea. *Tropical Medicine and Health,* 44. doi: 10.1186/s41182-016-0010-0.
217. Young, C.L., Lyons, A.C., Hsu, W.-W., Vanlandingham, D.L., Park, S.L., Bilyeu, A.N., Ayers, V.B., Hettenbach, S.M., Zelenka, A.M., Cool, K.R., and Peterson, G.J. (2020). Protection of swine by potent neutralizing anti-Japanese encephalitis virus monoclonal antibodies derived from vaccination. *Antiviral research,* 174, 104675. doi: 10.1016/j.antiviral.2019.104675.
218. Zeng, Z., Liu, Z., Wang, W., Tang, D., and Liang, H. (2014). Establishment and application of a multiplex PCR for rapid and simultaneous detection of six viruses in swine. *Journal of virological methods,* 208, 102–106. doi: 10.1016/j.jviromet.2014.08.001.
219. Zhang, H., Luo, H., Ur Rehman, M., Nabi, F., Li, K., Lan, Y., Huang, S., Zhang, L., Mehmood, K., Shahzad, M., and Li, J. (2017a). Evidence of JEV in *Culex tritaeniorhynchus* and pigs from high altitude regions of Tibet, China. *Journal of vector borne diseases*, 54(1), 69–73.
220. Zhang, H., Rehman, M.U., Li, K., Luo, H., Lan, Y., Nabi, F., Zhang, L., Iqbal, M.K., Zhu, S., Javed, M.T., and Chamba, Y. (2017b). Epidemiologic survey of Japanese encephalitis virus infection, Tibet, China, 2015. *Emerging infectious diseases,* 23(6), 1023–1024. doi: 10.3201/eid2306.152115.
221. Zhang, M., Xie, Z., Xie, L., Deng, X., Luo, S., Liu, J., Pang, Y., and Khan, M.I. (2015). Simultaneous detection of eight swine reproductive and respiratory pathogens using a novel GeXP analyser-based multiplex PCR assay. *Journal of virological methods,* 224, 9–15. doi: 10.1016/j.jviromet.2015.08.001.
222. Zhang, Y., Li, Y., Guan, Z., Yang, Y., Zhang, J., Sun, Q., Li, B., Qiu, Y., Liu, K., Shao, D., and Ma, Z. (2022). Rapid differential detection of Japanese encephalitis virus and Getah virus in pigs or mosquitos by a duplex TaqMan Real-Time RT-PCR assay. *Frontiers in Veterinary Science,* 9, 839443. doi: 10.3389/fvets.2022.839443.
223. Zhao, S., Lou, Y., Chiu, A.P.Y., and He, D. (2018). Modelling the skip-and-resurgence of Japanese encephalitis epidemics in Hong Kong. *Journal of theoretical biology,* 454, 1–10. doi: 10.1016/j.jtbi.2018.05.017.
224. Zheng, B., Wang, X., Liu, Y., Li, Y., Long, S., Gu, C., Ye, J., Xie, S., and Cao, S. (2019). Japanese encephalitis virus infection induces inflammation of swine testis through RIG-I—NF-ĸB signaling pathway. *Veterinary microbiology*, 238, 108430. doi: 10.1016/j.vetmic.2019.108430.
225. Zhou, D., Pei, C., Yang, K., Ye, J., Wan, S., Li, Q., Zhang, L., Chen, H., Cao, S., and Song, Y. (2019). Development and application of a monoclonal-antibody-based blocking ELISA for detection of Japanese encephalitis virus NS1 antibodies in swine. *Archives of virolology*, 164(6), 1535–1542. doi: 10.1007/s00705-019-04218-9.
226. Zhou, D., Wang, S., Yang, K., Liu, X., Liu, W., Guo, R., Liang, W., Yuan, F., Liu, Z., Gao, T., and Tian, Y.X. (2021). Rapid and simultaneous detection of Japanese encephalitis virus by real-time nucleic acid sequence-based amplification. *Microbial pathogenesis*, 150, 104724. doi: 10.1016/j.micpath.2020.104724.
227. Zhou, Y., Chen, L., Zhang, L., Shao, C., Sun, J., Jiang, S., Song, Q., Zhou, B., Yang, Y., Dong, W., Yang, Y., Wei, F., Fang, W., Wang, X., and Song, H. (2020). Simultaneous identification of 6 pathogens causing porcine reproductive failure by using multiplex ligation‐dependent probe amplification. *Transboundary and emerging diseases*, 67(6), 2467–2474. doi: 10.1111/tbed.13585.
